# Supplementary material for: Oxygen-bridged triarylboron substituted anthracene emitters with high-lying triplet–singlet intersystem crossing for efficient deep-blue OLEDs
Source: Royal Society of Chemistry journal article supplement (doi:10.1039/d4tc01621a), 2024-01-01
Supplement: d4tc01621a1.pdf [file d4tc01621a1.pdf]

## Supporting Information

### **Oxygen-Bridged Triarylboryl Substituted Anthracene Emitters with High-Lying Triplet–Singlet Intersystem Crossing for Efficient deep-blue OLEDs**

Ziquan Lu<sup>a</sup>, Dehua Hu<sup>a,b,\*</sup>, Si-Wei Chen<sup>a</sup>, Ruicheng Wang<sup>a</sup>, Longjiang Xing<sup>a</sup>, Yihong Zhu<sup>a</sup>, Jieying Lin<sup>a</sup>, Yanping Huo<sup>a,b</sup>, Shaomin Ji<sup>a,b,\*</sup>

<sup>a</sup>School of Chemical Engineering and Light Industry, Guangdong University of Technology, 510006, Guangzhou, P. R. China.

<sup>b</sup>Guangdong Provincial Laboratory of Chemistry and Fine Chemical Engineering Jieyang Center, Jieyang 515200, China

E-mail address: dehuahu@gdut.edu.cn (D. Hu) and smji@gdut.edu.cn (S. Ji)

## **1. Experimental Section**

### **1.1 General information**

All the reagents and solvents were purchased from commercial suppliers and used as received. The NMR spectra were recorded on a Bruker AVANCE 400 spectrometer, using tetramethylsilane (TMS) as the internal standard. Mass spectra (MS) were obtained on a Thermo Fisher TSQ Endura Mass spectrometer. Thermal gravimetric analysis (TGA) was measured on a NETZSCH STA449F5 Jupiter Synchronous thermal analyzer at a heating rate of 10 °C min<sup>-1</sup> under nitrogen flow rate of 80 mL min<sup>-1</sup>. Differential scanning calorimetry (DSC) was conducted on a METTLER TOLEDO (DSC3) unit at a heating rate of 10 °C min<sup>-1</sup> under nitrogen atmosphere. All ultraviolet–visible absorption spectra of the samples were recorded using Shimadzu UV-2700 UV-vis Spectrophotometer. The electrochemical properties were measured by cyclic voltammetry (CV) on PGSTAT 302N electrochemical workstation with a three electrode cell, Ag/AgNO<sub>3</sub> referenced against ferrocene/ferrocenium (Fc/Fc<sup>+</sup>), and glassy carbon electrode as working electrode at a scan rate of 0.1 V s<sup>-1</sup>, tetrabutylammonium hexafluorophosphate (Bu<sub>4</sub>NPF<sub>6</sub>) in anhydrous dichloromethane (0.1 M).

### **1.2 OLED fabrication**

OLEDs were fabricated on ITO-coated glass substrates with a sheet resistance of  $15 \Omega \text{ sq}^{-1}$  as a transparent anode, which were washed using detergent and underwent ultrasound bath of deionized water, acetone and isopropanol, successively for 15 minutes. And used after thoroughly dried and treated with  $\text{O}_2$  plasma for half of an hour. Under high vacuum better than  $10^{-6}$  Torr, materials were heated to sublimate and deposited onto ITO substrates. The rates of deposition were detected and controlled via quartz crystal oscillators, maintaining  $1\sim 2 \text{ \AA/s}$  for organic materials,  $0.1 \text{ \AA/s}$  for LiF and  $5 \text{ \AA/s}$  for aluminum cathode, respectively. Electroluminescence (EL) spectra and luminance were collected by a Spectroradiometer (Photo Research PR 650) and PMA-12 photonic multichannel analyzer (Hamamatsu), respectively. Current density and voltage were recorded on a Keithley 237 power source (Tektronix). External quantum efficiencies of devices were calculated using EL spectra and current, assuming the devices were Lambertian light sources.

## 2. Synthesis and Characterization

### Synthesis of 7-(anthracen-9-yl)-2,12-di-tert-butyl-5,9-dioxa-13b-boranaphtho[3,2,1-de]anthracene(BOOAn).

TDBA-Br (0.46 g, 1.0 mmol), B-An (0.33 g, 1.5 mmol, 1.5 equiv),  $\text{K}_2\text{CO}_3$  ( 2.56 g, 20.0 mmol), 5 mL distilled water, 20 mL toluene, 5 ml ethanol were placed in a 100 ml round-bottom flask. After the mixture was degassed,  $\text{Pd}(\text{PPh}_3)_4$  (58 mg, 0.05 mmol, 0.05 equiv) was added under nitrogen. The mixture was heated at  $90 \text{ }^\circ\text{C}$  for 24 hours under nitrogen.

The mixture was poured into water to quench the reaction and then extracted with dichloromethane. The organic phase was collected and dried over anhydrous Na<sub>2</sub>SO<sub>4</sub>. After evaporation of the solvent, the residue was purified via column chromatography by using petroleum ether/ dichloromethane (8:1, v/v) as eluent to afford yellow solid. (0.42 g, yield: 76%). <sup>1</sup>H NMR (500 MHz, CDCl<sub>3</sub>) δ 8.82 (d, J = 2.5 Hz, 2H), 8.55 (s, 1H), 8.07 (d, J = 8.5 Hz, 2H), 7.79 (dd, J = 8.7, 2.5 Hz, 2H), 7.73 (dd, J = 8.8, 1.2 Hz, 2H), 7.51 (s, 1H), 7.49 – 7.45 (m, 3H), 7.38 – 7.33 (m, 2H), 7.31 (s, 2H), 1.51 (s, 18H). <sup>13</sup>C NMR (126 MHz, CDCl<sub>3</sub>) δ 158.88, 157.57, 145.90, 145.19, 136.26, 131.66, 131.38, 130.39, 129.98, 128.43, 127.12, 126.82, 125.74, 125.31, 118.15, 111.54, 40.48, 32.71. LC-MS m/z: calcd for C<sub>40</sub>H<sub>35</sub>BO<sub>2</sub>, 558.5280; found, 559.28192 [M + H]<sup>+</sup>.

**Synthesis of 9,10-bis(2,12-di-tert-butyl-5,9-dioxa-13b-boranaphtho[3,2,1-de]anthracen-7-yl)anthracene(2BOOAn).**

TDBA-Br (1.012 g, 2.2 mmol, 2.2 equiv), 2B-An (0.43 g, 1.0 mmol), K<sub>2</sub>CO<sub>3</sub> ( 2.56 g, 20.0 mmol), 10 mL distilled water, 40 mL toluene, 10 ml ethanol were placed in a 100 ml round-bottom flask. After the mixture was degassed, Pd(PPh<sub>3</sub>)<sub>4</sub> (115.6 mg, 0.1 mmol, 0.1 equiv) was added under nitrogen. The mixture was heated at 100 °C for 24 hours under nitrogen. The mixture was poured into water to quench the reaction and then extracted with dichloromethane. The organic phase was collected and dried over anhydrous

Na<sub>2</sub>SO<sub>4</sub>. After evaporation of the solvent, the residue was purified via column chromatography by using petroleum ether/ dichloromethane (6:1, v/v) as eluent to afford yellow solid. (0.68 g, yield: 73%). <sup>1</sup>H NMR (400 MHz, CDCl<sub>3</sub>) δ 8.87 – 8.82 (d, J = 2.6 Hz, 4H), 7.86 – 7.77 (m, 8H), 7.57 – 7.51 (d, J = 8.7 Hz, 4H), 7.44 – 7.32 (m, 8H), 1.56 – 1.51 (s, 36H). <sup>13</sup>C NMR (126 MHz, CDCl<sub>3</sub>) δ 158.90, 157.62, 146.10, 145.21, 136.82, 131.71, 130.41, 129.59, 126.99, 125.53, 118.20, 111.65, 35.53, 31.69. HR-MS m/z: calcd for C<sub>66</sub>H<sub>60</sub>B<sub>2</sub>O<sub>4</sub>, 938.4678; found, 939.47614 [M + H]<sup>+</sup>.

**Table S1.** Crystal data and structure refinement of three compounds

| Parameter         | <b>BOOAn</b>                                    | <b>2BOOAn</b>                                   |
|-------------------|-------------------------------------------------|-------------------------------------------------|
| Empirical formula | C <sub>40</sub> H <sub>35</sub> BO <sub>2</sub> | C <sub>33</sub> H <sub>30</sub> BO <sub>2</sub> |
| Formula weight    | 558.49                                          | 469.38                                          |
| Temperature/K     | 150.00(10)                                      | 149.99(10)                                      |
| Crystal system    | triclinic                                       | monoclinic                                      |
| Space group       | P-1                                             | I2/a                                            |
| a/Å               | 11.2801(3)                                      | 16.71187(12)                                    |
| b/Å               | 11.4292(4)                                      | 11.15052(8)                                     |
| c/Å               | 24.0256(7)                                      | 27.2171(2)                                      |
| α/°               | 81.538(3)                                       | 90                                              |
| β/°               | 89.599(2)                                       | 96.4401(7)                                      |
| γ/°               | 78.204(3)                                       | 90                                              |

|                                                |                                                                   |                                                                  |
|------------------------------------------------|-------------------------------------------------------------------|------------------------------------------------------------------|
| Volume/Å <sup>3</sup>                          | 2998.17(16)                                                       | 5039.79(7)                                                       |
| Z                                              | 4                                                                 | 8                                                                |
| $\rho_{\text{calc}}/\text{cm}^3$               | 1.237                                                             | 1.237                                                            |
| $\mu/\text{mm}^{-1}$                           | 0.569                                                             | 0.577                                                            |
| F(000)                                         | 1184.0                                                            | 1992.0                                                           |
| Crystal size/mm <sup>3</sup>                   | 0.15 × 0.14 × 0.12                                                | 0.15 × 0.12 × 0.11                                               |
| Radiation                                      | Cu K $\alpha$ ( $\lambda = 1.54184$ )                             | Cu K $\alpha$ ( $\lambda = 1.54184$ )                            |
| 2 $\Theta$ range for data collection/°         | 7.442 to 147.608                                                  | 9.554 to 152.988                                                 |
| Index ranges                                   | -14 ≤ h ≤ 11, -14 ≤ k ≤ 14,<br>-29 ≤ l ≤ 29                       | -21 ≤ h ≤ 20, -13 ≤ k ≤ 13,<br>-34 ≤ l ≤ 34                      |
| Reflections collected                          | 21352                                                             | 16787                                                            |
| Independent reflections                        | 11769 [R <sub>int</sub> = 0.0383,<br>R <sub>sigma</sub> = 0.0490] | 5073 [R <sub>int</sub> = 0.0158,<br>R <sub>sigma</sub> = 0.0116] |
| Data/restraints/parameters                     | 11769/0/787                                                       | 5073/0/331                                                       |
| Goodness-of-fit on F <sup>2</sup>              | 1.034                                                             | 1.036                                                            |
| Final R indexes [I ≥ 2 $\sigma$<br>(I)]        | R <sub>1</sub> = 0.0509, wR <sub>2</sub> = 0.1335                 | R <sub>1</sub> = 0.0411, wR <sub>2</sub> = 0.1079                |
| Final R indexes [all data]                     | R <sub>1</sub> = 0.0587, wR <sub>2</sub> = 0.1422                 | R <sub>1</sub> = 0.0420, wR <sub>2</sub> = 0.1086                |
| Largest diff. peak/hole / e<br>Å <sup>-3</sup> | 0.31/-0.34                                                        | 0.24/-0.23                                                       |

---

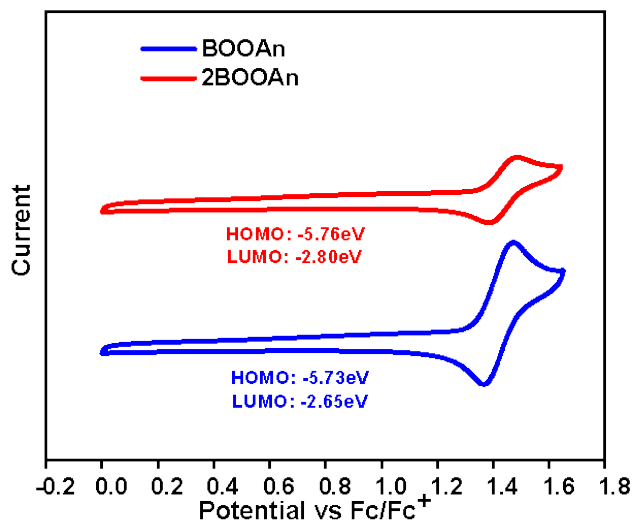

**Fig. S1.** CV of BOOAn and 2BOOAn, the potentials are calibrated against Fc/Fc<sup>+</sup> internal standard.

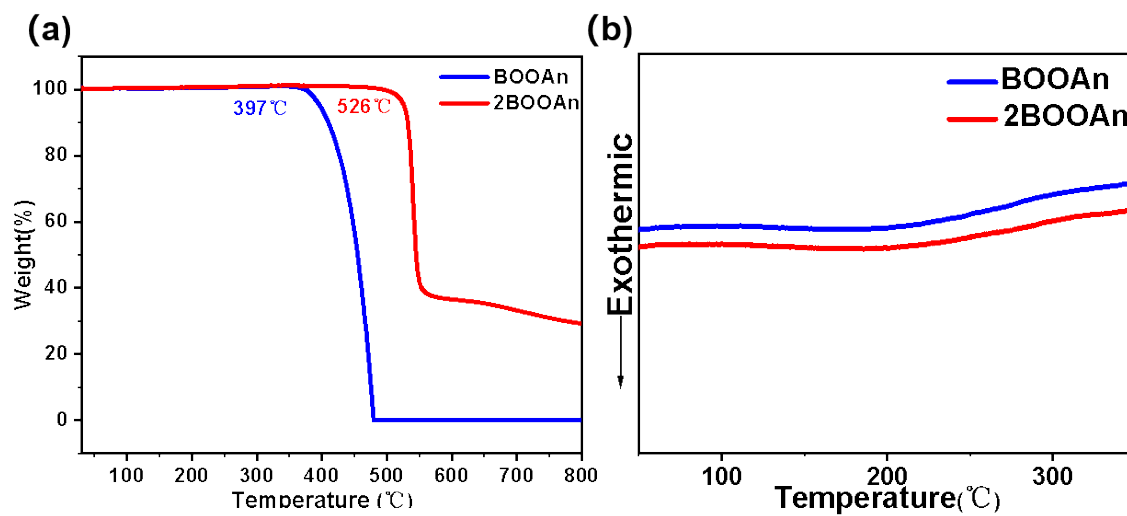

**Fig. S2.** TGA(a) and DSC (b) profiles of BOOAn and 2BOOAn.

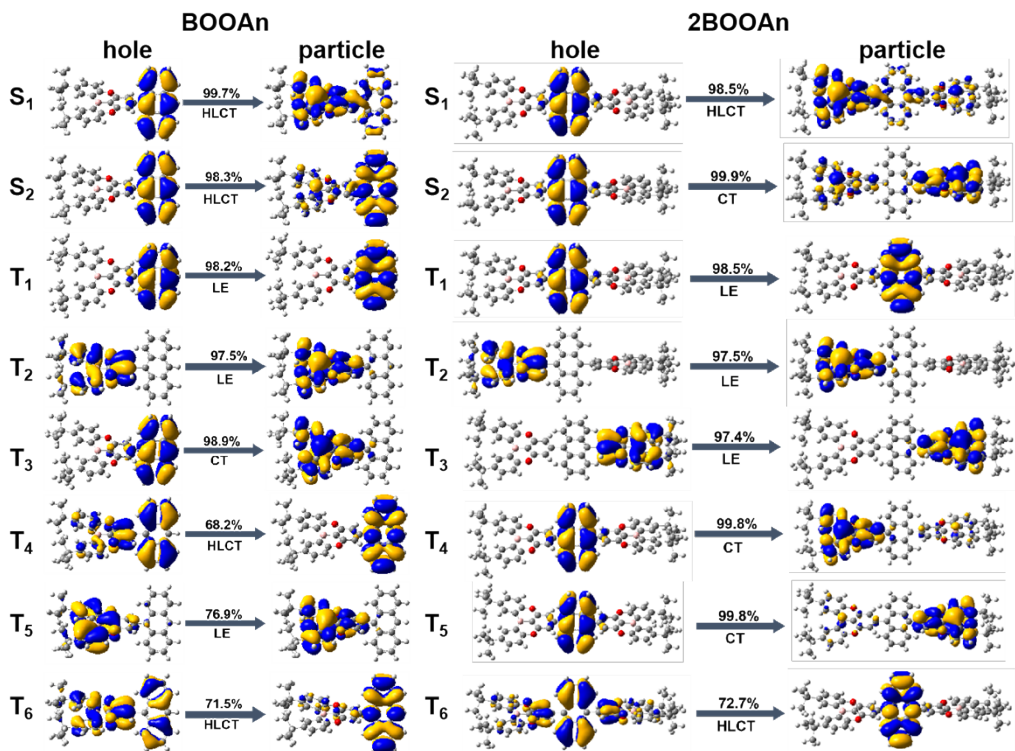

**Fig. S3.** The NTO transition character in first two singlet and six triplet states of BOOAn(a) and 2BOOAn(b).

**Table S2.** Detailed absorption and emission peak positions of BOOAn and 2BOOAn in different solvents.

| Solvents   | $\epsilon$ | n     | $f(\epsilon, n)$ | BOOAn               |                     |                                         | 2BOOAn              |                     |                                         |
|------------|------------|-------|------------------|---------------------|---------------------|-----------------------------------------|---------------------|---------------------|-----------------------------------------|
|            |            |       |                  | $\lambda_a$<br>(nm) | $\lambda_f$<br>(nm) | $\nu_a - \nu_f$<br>( $\text{cm}^{-1}$ ) | $\lambda_a$<br>(nm) | $\lambda_f$<br>(nm) | $\nu_a - \nu_f$<br>( $\text{cm}^{-1}$ ) |
| Hexane     | 0          | 1.375 | 0.0012           | 384                 | 408                 | 1532                                    | 383                 | 435                 | 3121                                    |
| Toluene    | 2.38       | 1.494 | 0.014            | 386                 | 420                 | 2097                                    | 384                 | 444                 | 3519                                    |
| Butylether | 3.08       | 1.399 | 0.096            | 385                 | 417                 | 1993                                    | 382                 | 440                 | 3451                                    |



|                 |      |       |       |     |     |      |     |     |      |
|-----------------|------|-------|-------|-----|-----|------|-----|-----|------|
| Ethyl ether     | 4.34 | 1.352 | 0.167 | 384 | 418 | 2118 | 381 | 437 | 3363 |
| Ethyl acetate   | 6.02 | 1.372 | 0.2   | 382 | 433 | 3083 | 380 | 442 | 3691 |
| Tetrahydrofuran | 7.58 | 1.407 | 0.21  | 386 | 435 | 2918 | 381 | 445 | 3775 |
| Dichloromethane | 8.93 | 1.424 | 0.217 | 385 | 439 | 3195 | 381 | 446 | 3825 |
| Acetonitrile    | 37.5 | 1.344 | 0.305 | 387 | 470 | 4536 | 377 | 456 | 4595 |

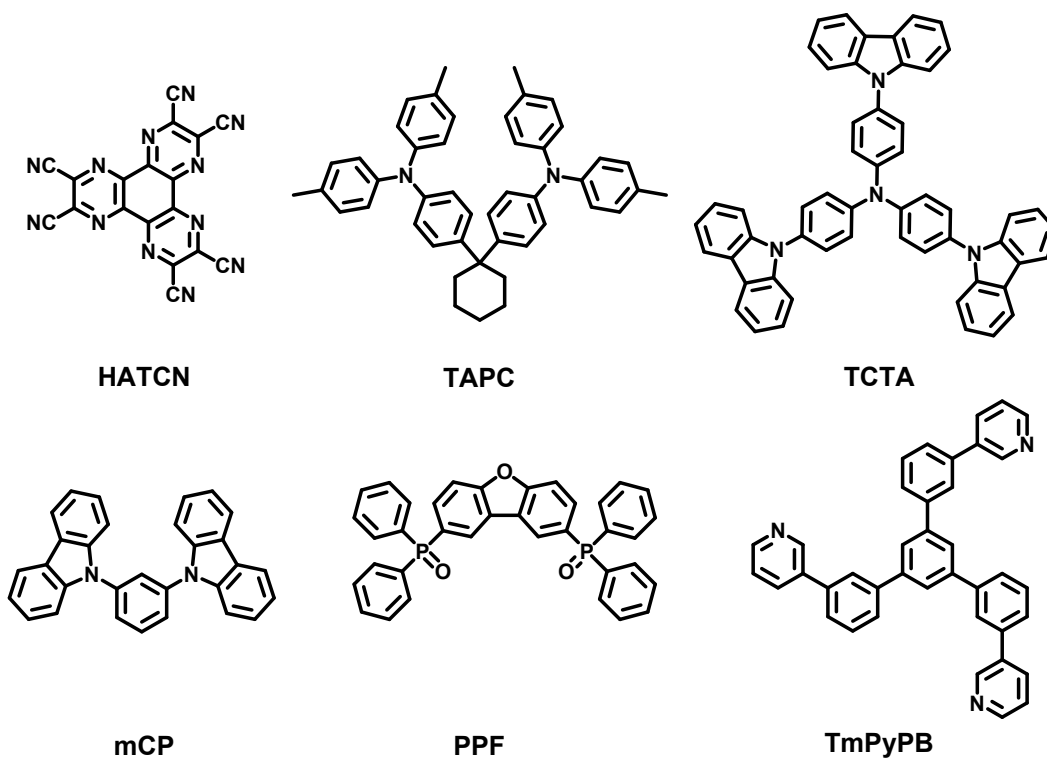

**Fig. S4.** Chemical structures of the OLED materials.

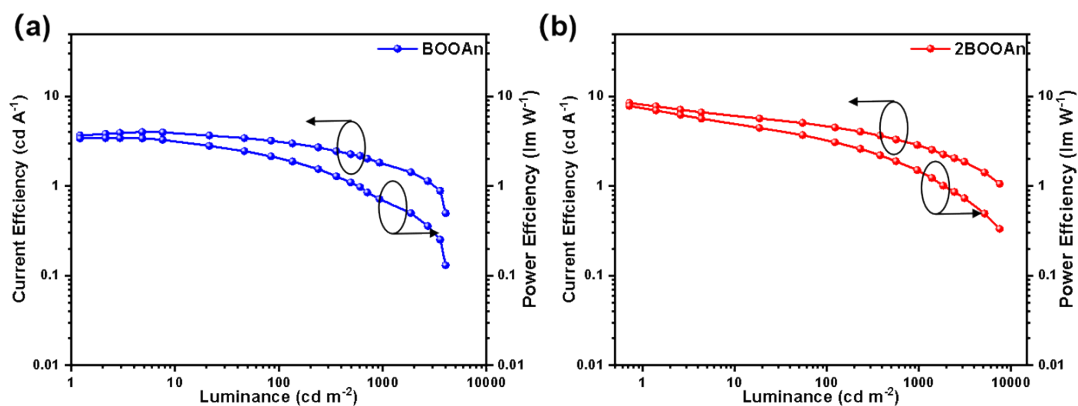

**Fig. S5.** CE and PE as a function of luminance for doped devices based on (a) BOOAn and (b) 2BOOAn.

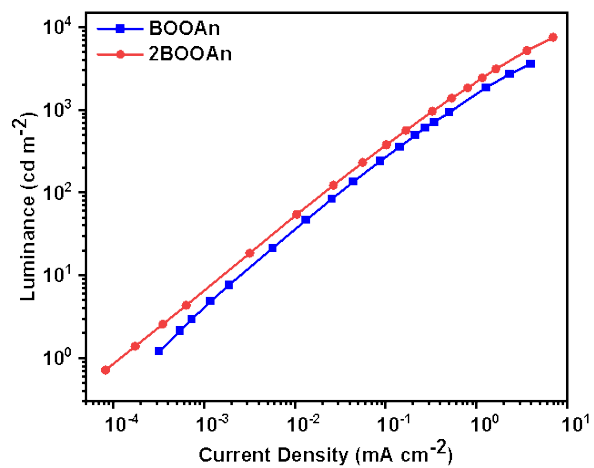

**Fig. S6.** Luminescence-current density curves of the doped devices BOOAn and 2BOOAn.

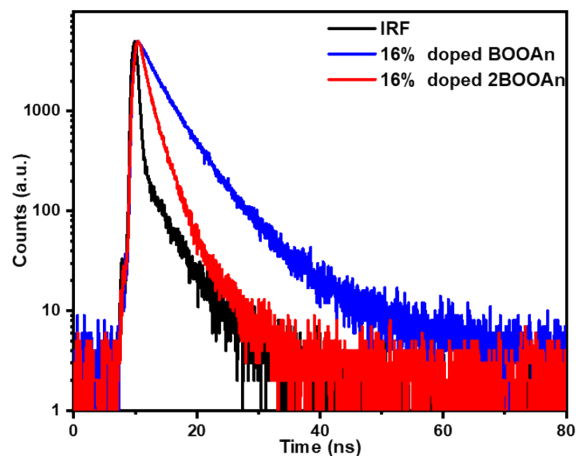

**Fig. S7.** The transient PL decay of BOOAn and 2BOOAn in doped film.

**Table S3.** The kinetic parameters of BOOAn and 2BOOAn.

| compound | $\tau_1^a$ | $\tau_2^b$ | $\Phi^c$ | $\Phi_{PF}^d$ | $\Phi_{DF}^e$ | $K_r^f$            | $K_{nr}^g$         | $k_{ISC}^h$        | $k_{RISC}^i$       |
|----------|------------|------------|----------|---------------|---------------|--------------------|--------------------|--------------------|--------------------|
|          | (ns)       | (ns)       | (%)      | (%)           | (%)           | (s <sup>-1</sup> ) | (s <sup>-1</sup> ) | (s <sup>-1</sup> ) | (s <sup>-1</sup> ) |
| BOOAn    | 3.4        | 7.8        | 67       | 48.2          | 18.8          | $1.66 \times 10^8$ | $0.82 \times 10^8$ | $0.47 \times 10^8$ | $3.16 \times 10^8$ |
| 2BOOAn   | 1.3        | 3.4        | 74       | 49.2          | 24.8          | $4.51 \times 10^8$ | $1.59 \times 10^8$ | $1.59 \times 10^8$ | $7.16 \times 10^8$ |

<sup>a</sup>Prompt fluorescence lifetime; <sup>b</sup>delayed fluorescence lifetime; <sup>c</sup>fluorescent quantum yield of doped film; <sup>d</sup>prompt fluorescent quantum yield of doped film; <sup>e</sup>delayed fluorescent quantum yield of doped film; <sup>f</sup>rate of radiative transition ( $k_r = \Phi_{PF}/\tau_1 + \Phi_{PF}/\tau_2$ ); <sup>g</sup>rate of non-radiative transition ( $k_{nr} = k_r(1-\Phi)/\Phi$ ); <sup>h</sup>rate of intersystem crossing ( $K_{ISC} = 1/\tau_1 - 1/\tau_2 - k_{nr}$ ); <sup>i</sup>rate of reverse intersystem crossing ( $k_{RISC} = \Phi_{DF}/(k_{ISC}\Phi_{PF}\tau_1\tau_2)$ ).

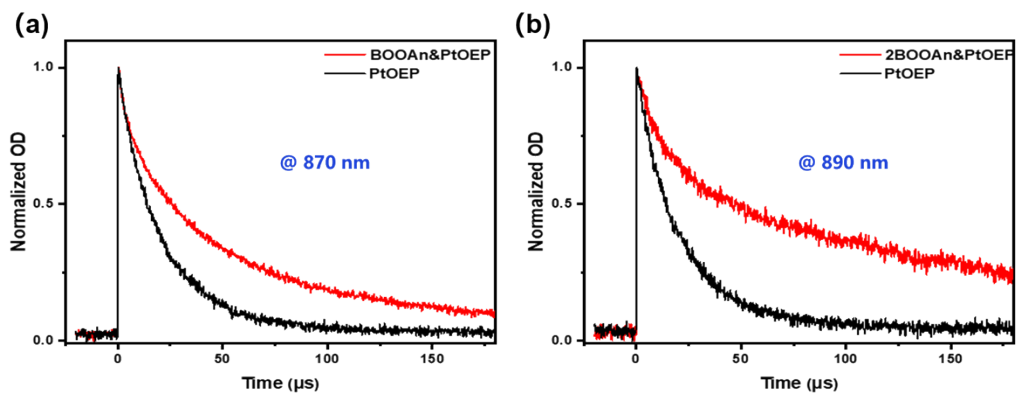

**Fig. S8.** Triplet decay trace detected at (a) 870 nm and (b) 890 nm.

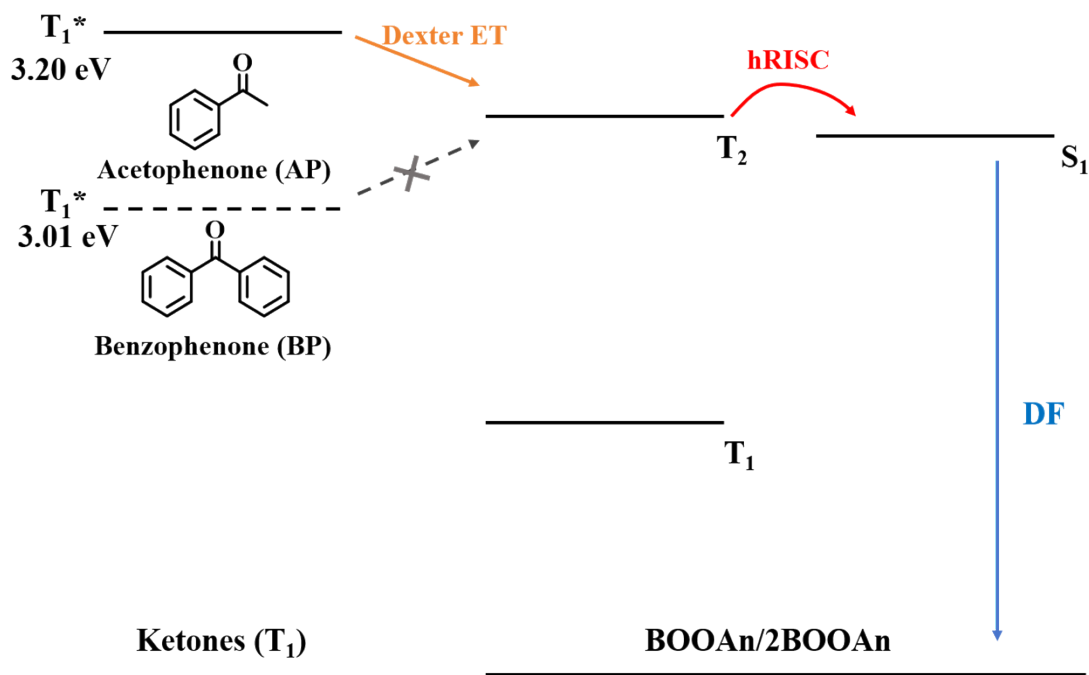

**Fig. S9.** Schematic illustration of the excited states of the ketones and BOOAn/2BOOAn and the corresponding photophysical processes.

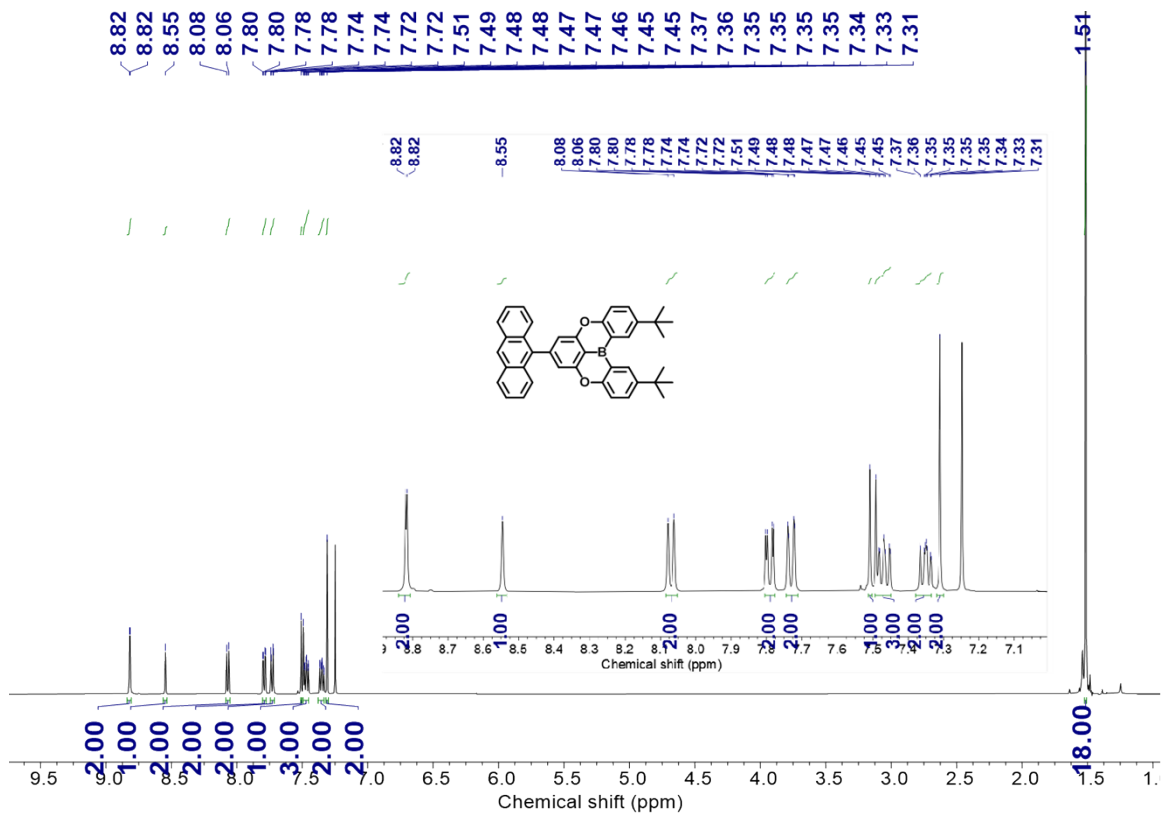

**Fig. S10.**  $^1\text{H}$  NMR of BOOAn ( $\text{CDCl}_3$ ).

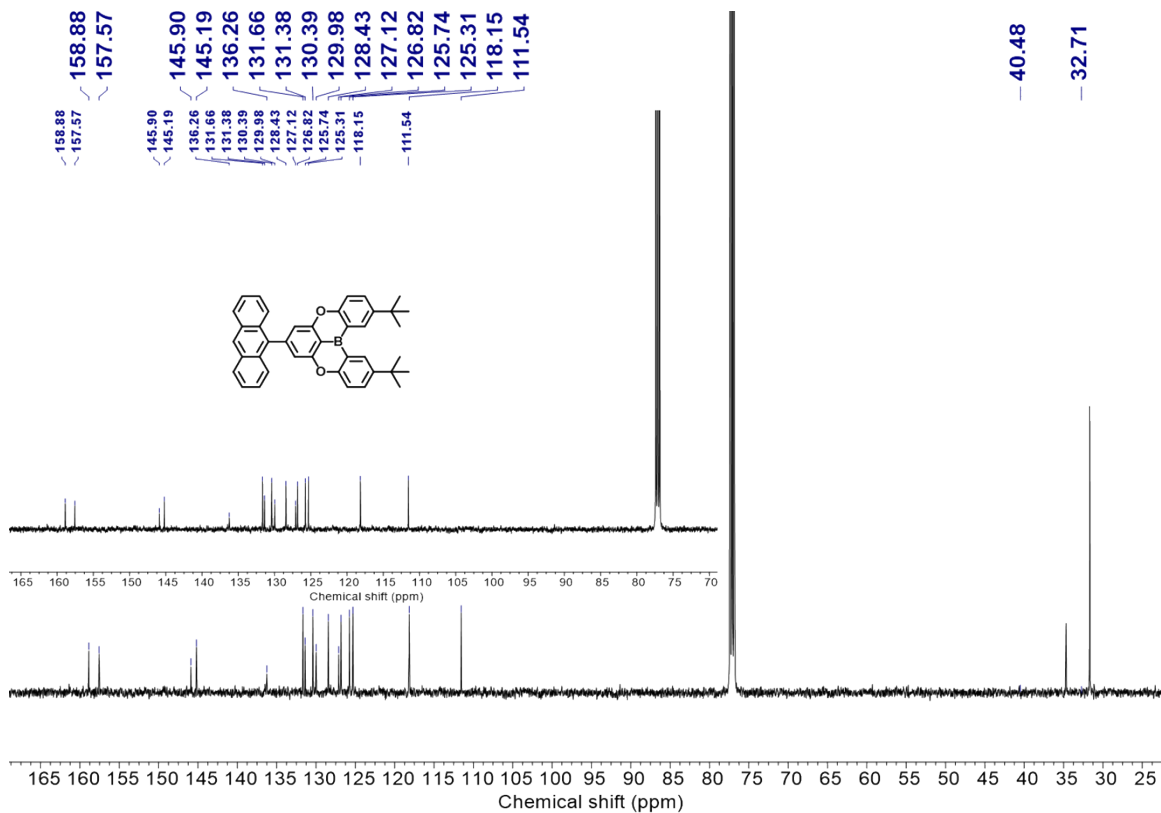

**Fig. S11.** <sup>13</sup>C NMR of BOOAn (CDCl<sub>3</sub>).

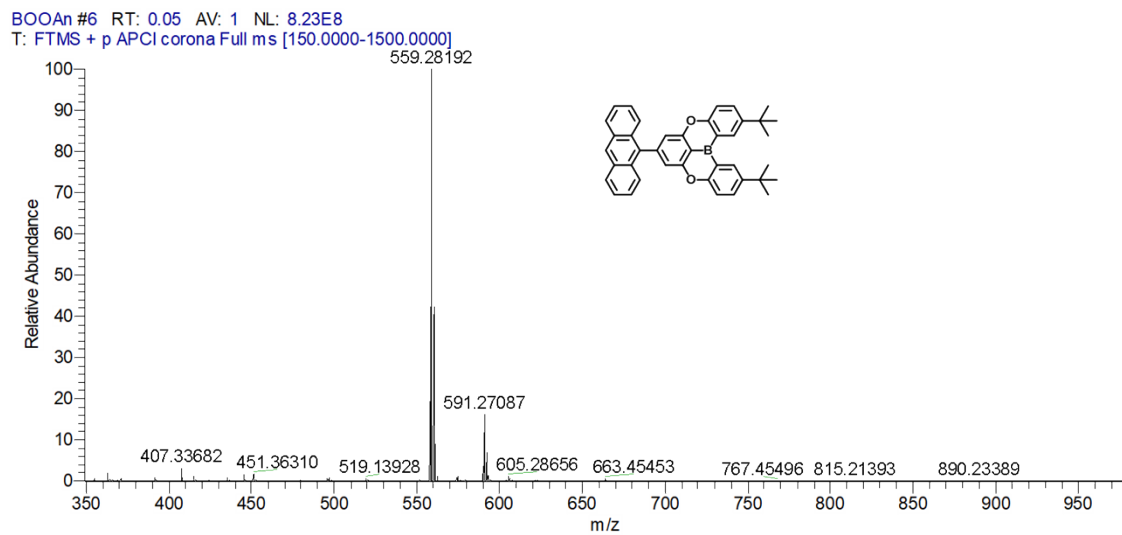

**Fig. S12.** HR MS of BOOAn.

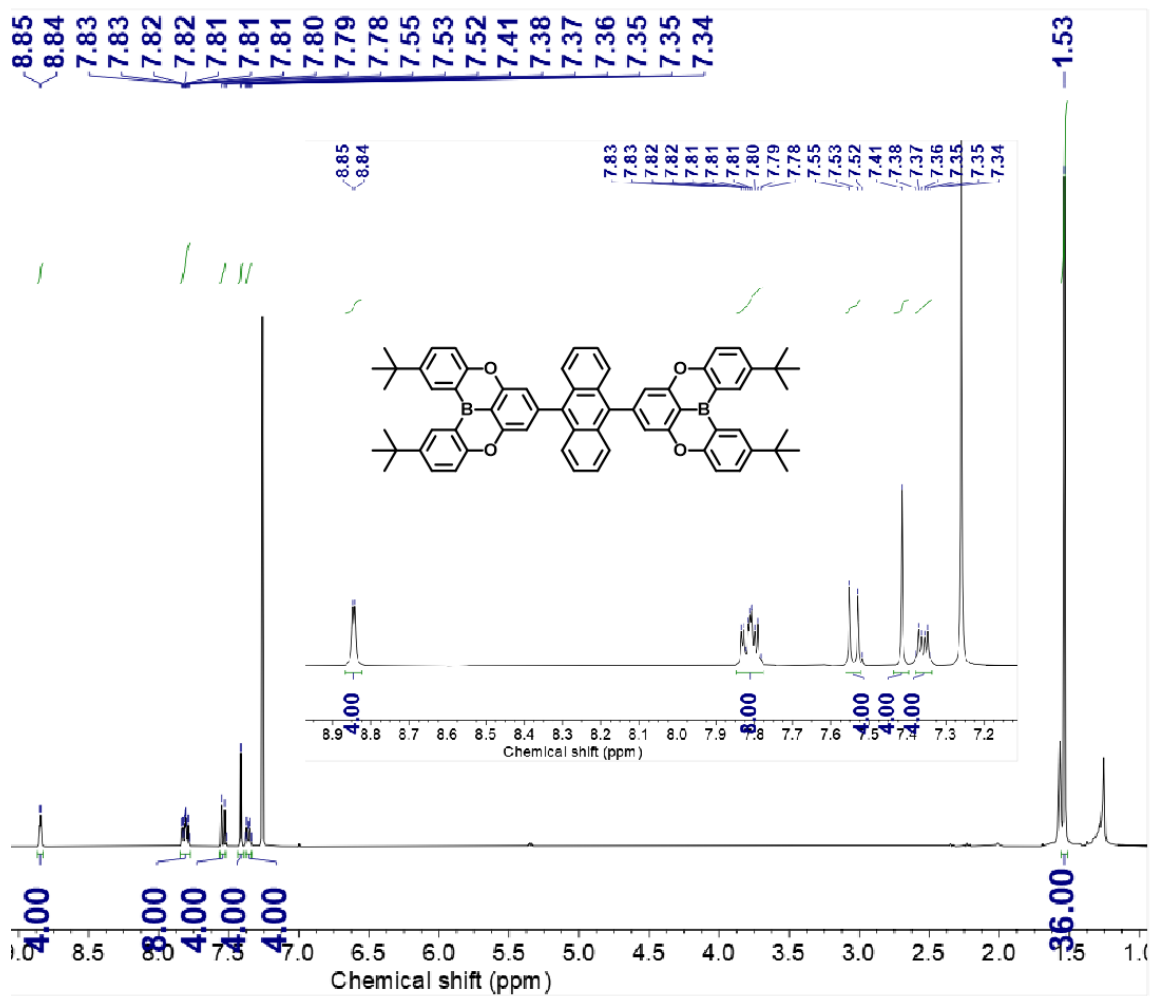

Fig. S13.  $^1\text{H}$  NMR of 2BBOAn ( $\text{CDCl}_3$ ).

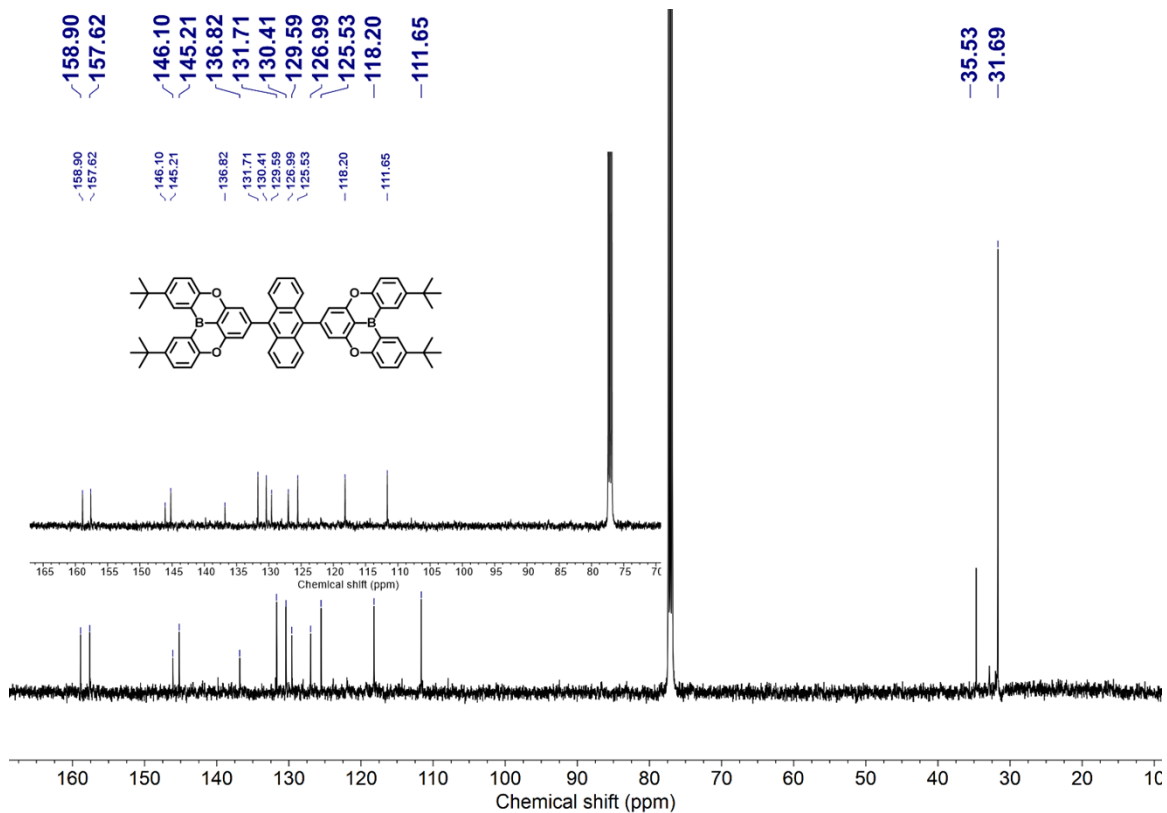

Fig. S14.  $^{13}\text{C}$  NMR of 2BOOAn ( $\text{CDCl}_3$ ).

2BOOAn #6 RT: 0.06 AV: 1 SB: 1 0.02 NL: 9.27E6  
 T: FTMS + p APCI corona Full ms [150.0000-1500.0000]

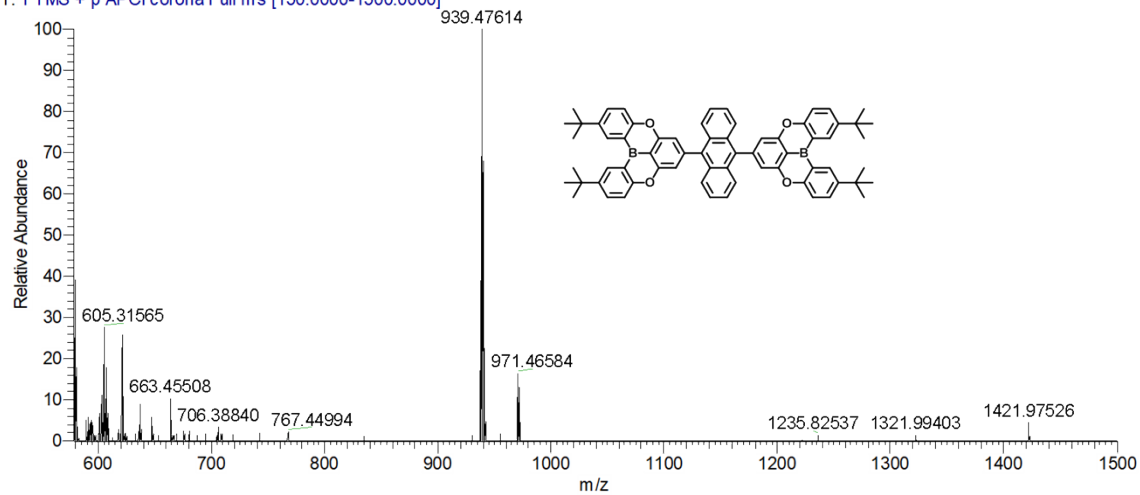

Fig. S15. HR MS of 2BOOAn.
